# Supplementary material for: Effects of Spatial Expression of Activating Transcription Factor 4 on the Pathogenicity of Two Phenotypes of Bovine Viral Diarrhea Virus by Regulating the Endoplasmic Reticulum-Mediated Autophagy Process
Source: PubMed Central journal article supplement (PMC10101076; doi:10.1128/spectrum.04225-22), 2023-03-20
Supplement: spectrum.04225-22-s0001.pdf [file spectrum.04225-22-s0001.pdf]

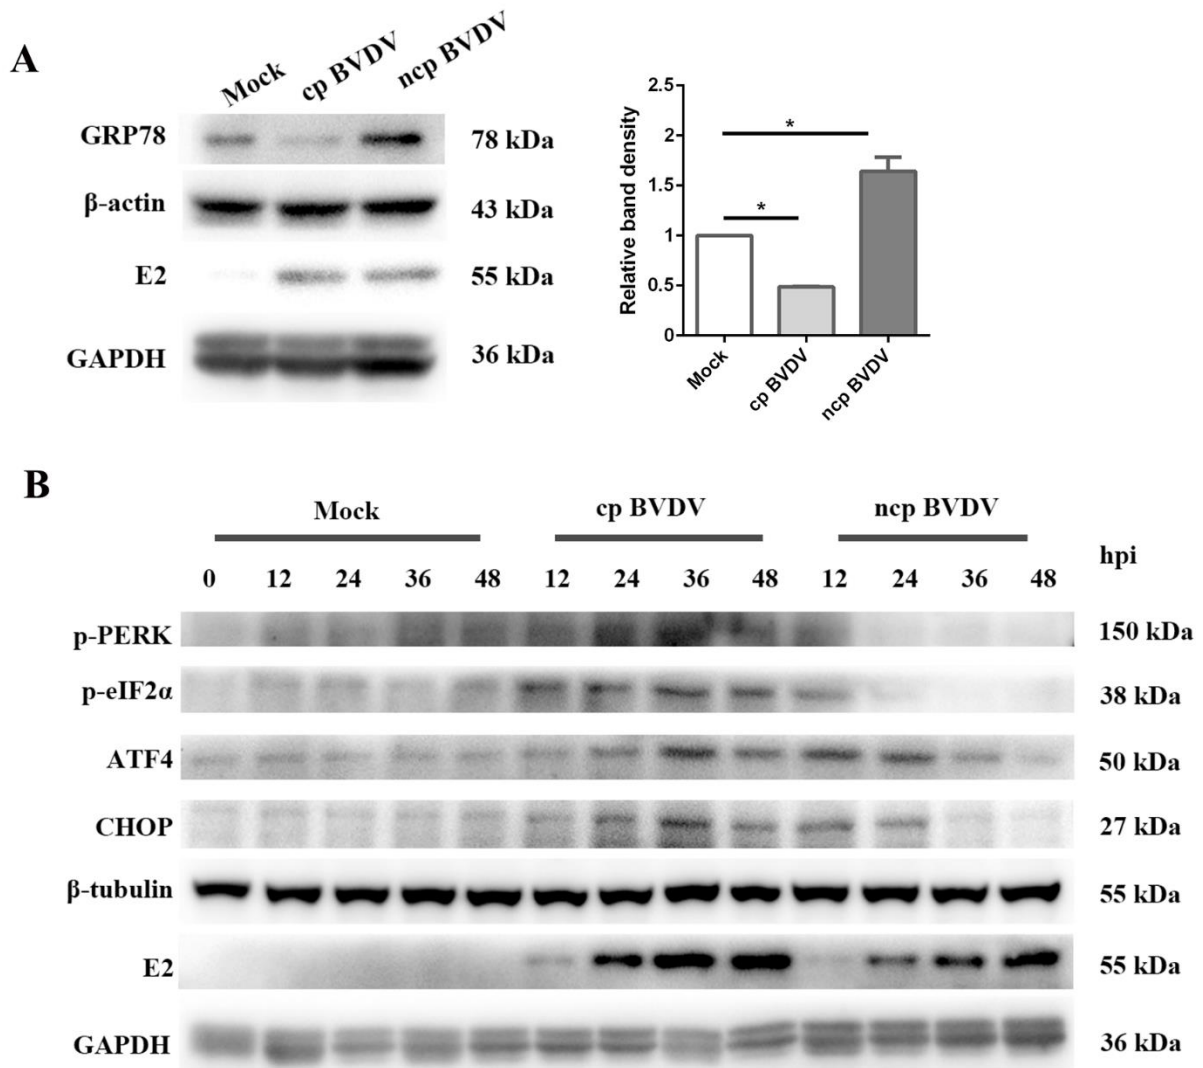

Figure S1 Two phenotypes of BVDV differentially regulate GRP78 expression and induce UPR at different stages of infection. MDBK cells were exposed to cp BVDV (MOI = 1) and ncp BVDV (MOI = 1) and harvested at the indicated time points. (A) Western blot analysis of GRP78 in MDBK cells infected with cp and ncp BVDV at 24 hpi. GAPDH was set for a loading control, and E2 served as an infection indicator. (B) Western blot analysis of proteins related to PERK-eIF2 $\alpha$ -ATF4 signaling branch after cp and ncp BVDV challenge. Values are shown as mean  $\pm$  SEM of three experiments that are independent and replicated, and the significance of data is indicated as follows: \*,  $P < 0.05$ ; \*\*,  $P < 0.01$ ; ns, no significance.
